# Supplementary material
Source: MDPI journal article supplement (https://www.mdpi.com/2304-6740/5/2/31)
Supplement: s1 [file s1]

# Supplementary Materials: Hydrogen Sorption in Erbium Borohydride Composite Mixtures with $\text{LiBH}_4$ and/or $\text{LiH}$

Michael Heere <sup>1</sup>, Seyed Hosein Payandeh GharibDoust <sup>2</sup>, Matteo Brighi <sup>3</sup>, Christoph Frommen <sup>1</sup>, Magnus H. Sørby <sup>1</sup>, Radovan Černý <sup>3</sup>, Torben R. Jensen <sup>2</sup> and Bjørn C. Hauback <sup>1</sup>

<sup>1</sup> Physics Department, Institute for Energy Technology, NO-2027 Kjeller, Norway; heere.michael@gmail.com (M.H.); Christoph.Frommen@ife.no (C.F.); Magnus.Sorby@ife.no (M.H.S.)

<sup>2</sup> Interdisciplinary Nanoscience Center (iNANO) and Department of Chemistry, University of Århus, Langelandsgade 140, DK-8000 Århus C, Denmark; hosein.payandeh@inano.au.dk (S.H.P.G.); trj@chem.au.dk (T.R.J.)

<sup>3</sup> Laboratory of Crystallography, Department of Quantum Matter Physics, University of Geneva, Quai Ernest-Ansermet 24, CH-1211 Geneva, Switzerland; Matteo.Brighi@unige.ch (M.B.); Radovan.Cerny@unige.ch (R.Č.)

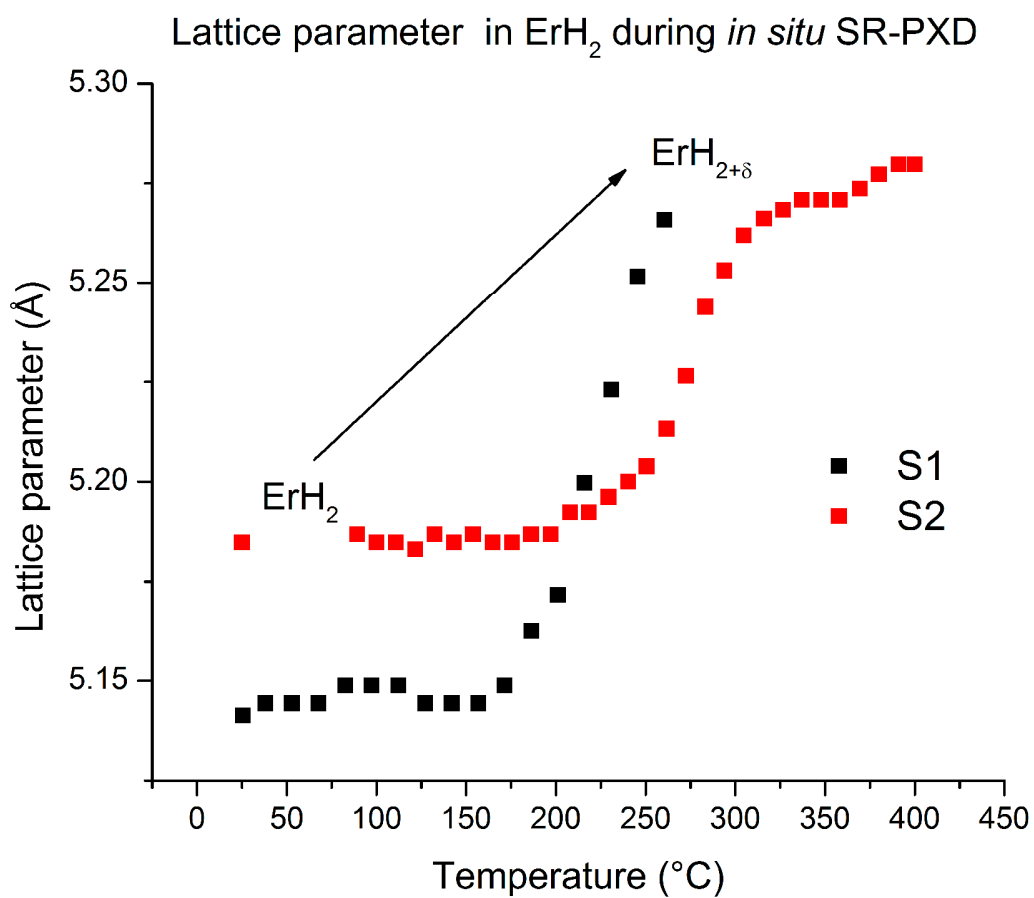

**Figure S1.** SR-PXD data of thermal desorption of S1 and S2. Shown is the increasing lattice parameter of  $\text{ErH}_2$  for S1 (black curve) and S2 (red curve). Reason of the increase in lattice parameter is probably a hydrogenation reaction of  $\text{ErH}_2$  to  $\text{ErH}_{2+\delta}$  with ( $0 \leq \delta \leq 1$ ), possibly  $\text{ErH}_3$ , rather than pure thermal expansion.  $\lambda = 0.77787 \text{ \AA}$ .

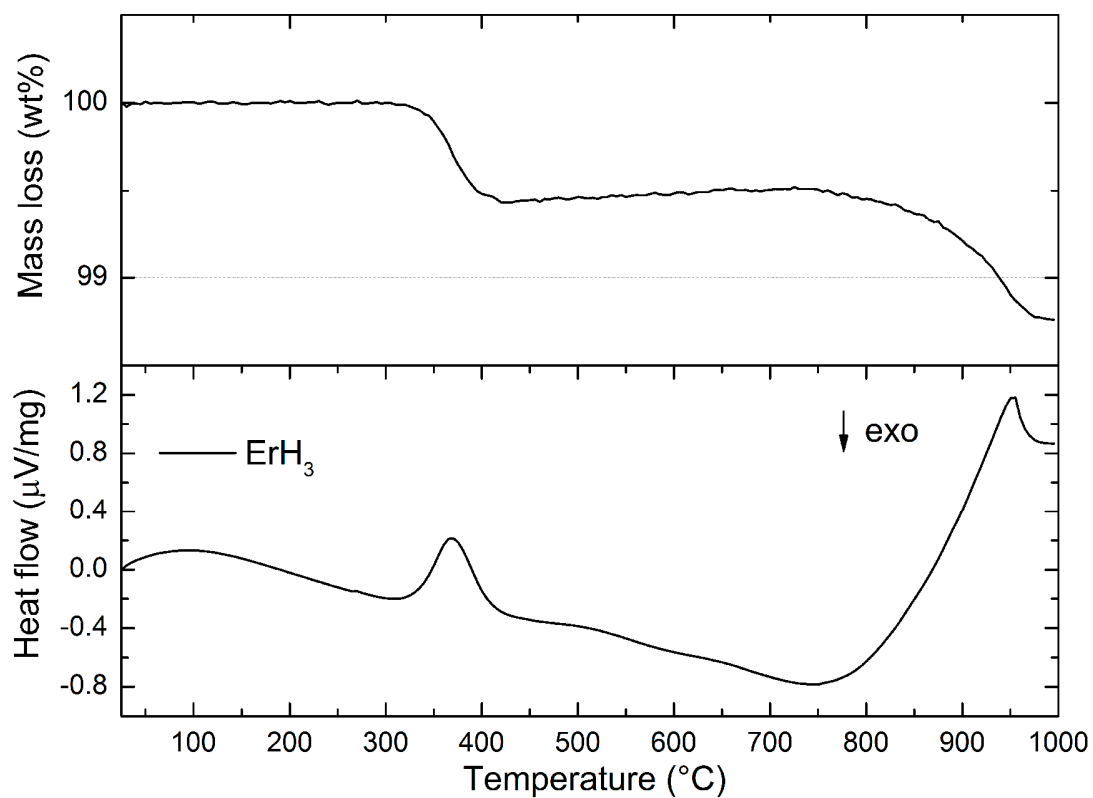

**Figure S2.** TG-DSC data of pure ErH<sub>3</sub> between 25 and 1000 °C. The first endothermic peak corresponds to the reduction of ErH<sub>3</sub> to ErH<sub>2</sub> and is consistent with the weight loss. The second endothermic peak corresponds to the reduction of ErH<sub>2</sub> to Er and is also consistent with the weight loss.

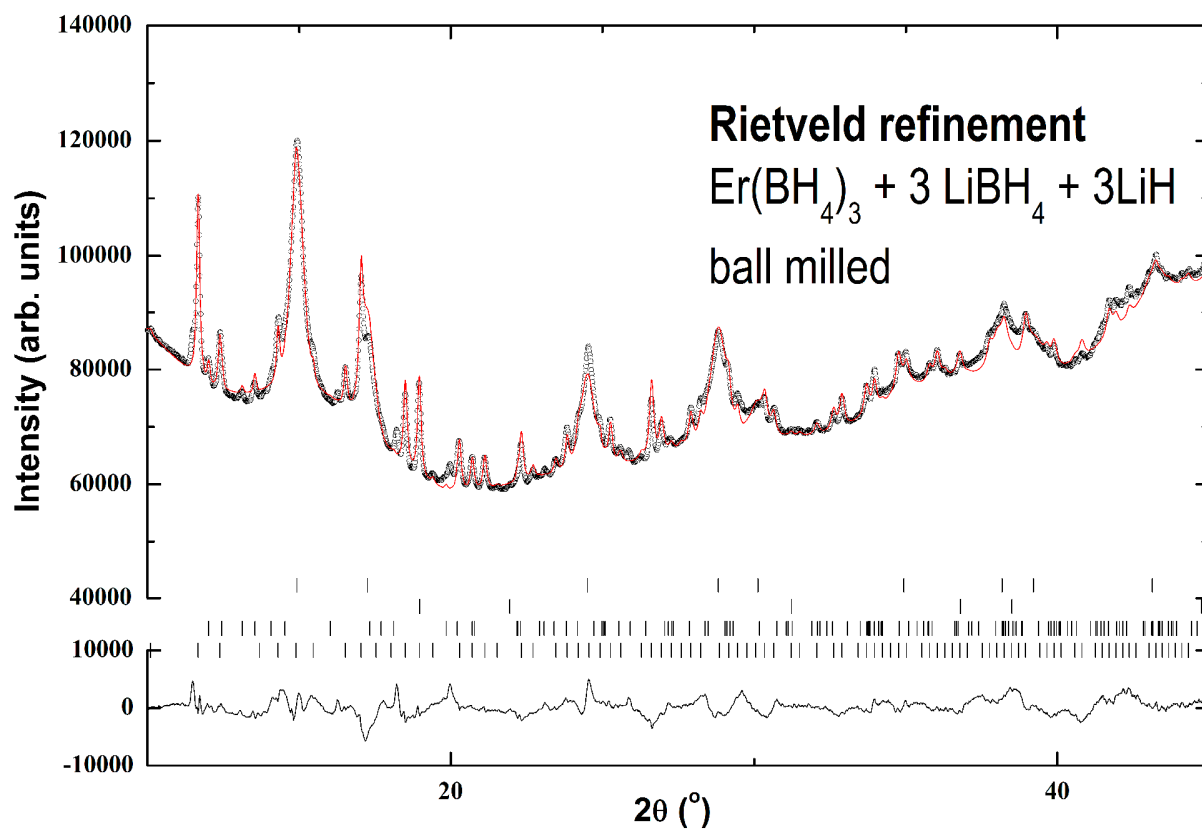

**Figure S3.** SR-PXD Rietveld refinement and difference plot of S2 after ball milling and storage in Argon atmosphere for 9 month. Observed (circles) and calculated (red line) patterns and difference plot (below). Vertical tick marks for the Bragg peak positions for (from top): 1. *c*-ErH<sub>3</sub> with 32.1(1) wt% 2. LiH with 0.0(9) wt% 3. LiBH<sub>4</sub> with 38.2(16) wt%, 4. Er(BH<sub>4</sub>)<sub>3</sub> with 29.7(1) wt%;  $R_{wp} = 1.33\%$ .  $\lambda = 0.7778 \text{ \AA}$ .

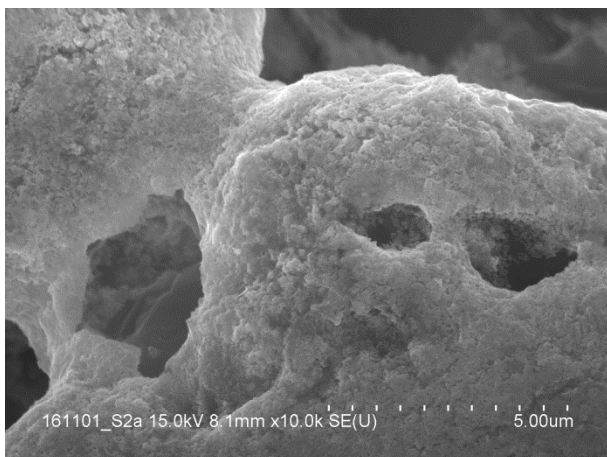

**Figure S4.** SEM image of the absorbed S1 after conductivity measurements. Showing surface morphologies of the absorbed sample. Magnification 10.000.

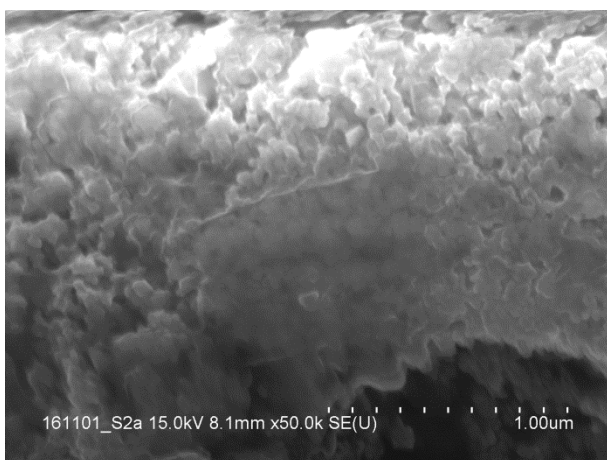

**Figure S5.** SEM image of the absorbed S1 after conductivity measurements. Magnification 50.000.

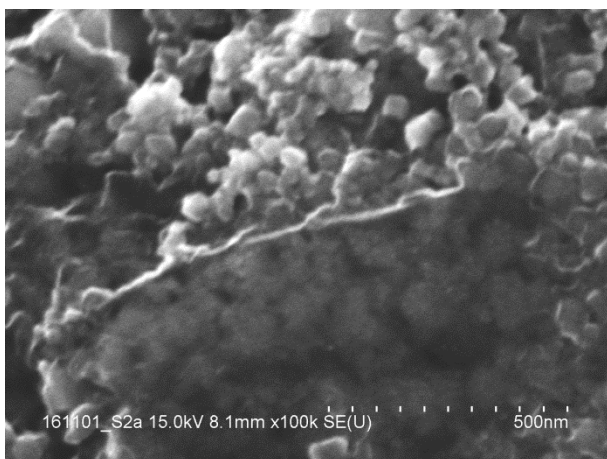

**Figure S6.** SEM image of the absorbed S1 after conductivity measurements. Magnification 100.000.

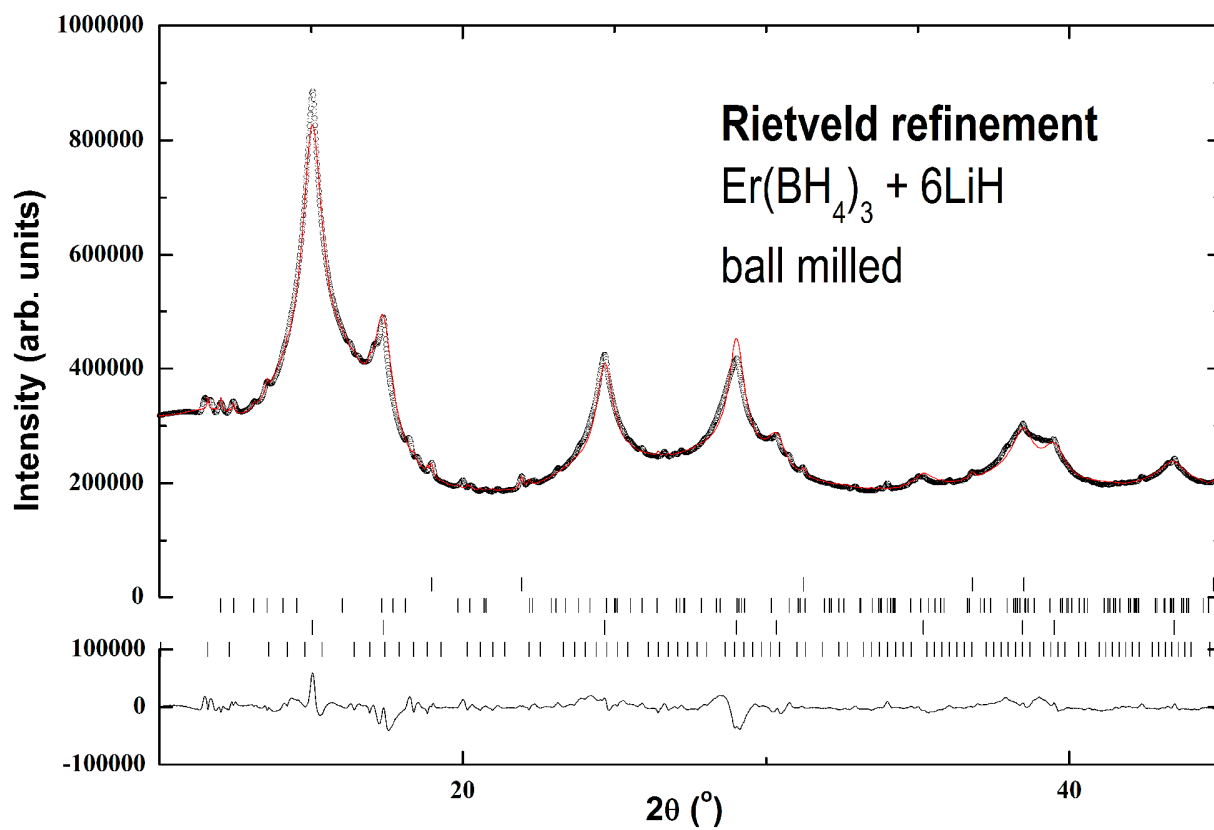

**Figure S7.** SR-PXD Rietveld refinement and difference plot of S1 after ball milling. Observed (circles) and calculated (red line) patterns and difference plot (below). Vertical tick marks for the Bragg peak positions for (from top): 1. LiH with 24.8(2) wt% 2. LiBH<sub>4</sub> with 29.9(3) wt%, 3. *c*-ErH<sub>3</sub> with 44.1(4) wt%; 4. Er(BH<sub>4</sub>)<sub>3</sub> with 1.1(2) wt%.  $R_{wp} = 2.65\%$ .  $\lambda = 0.7778 \text{ \AA}$ .

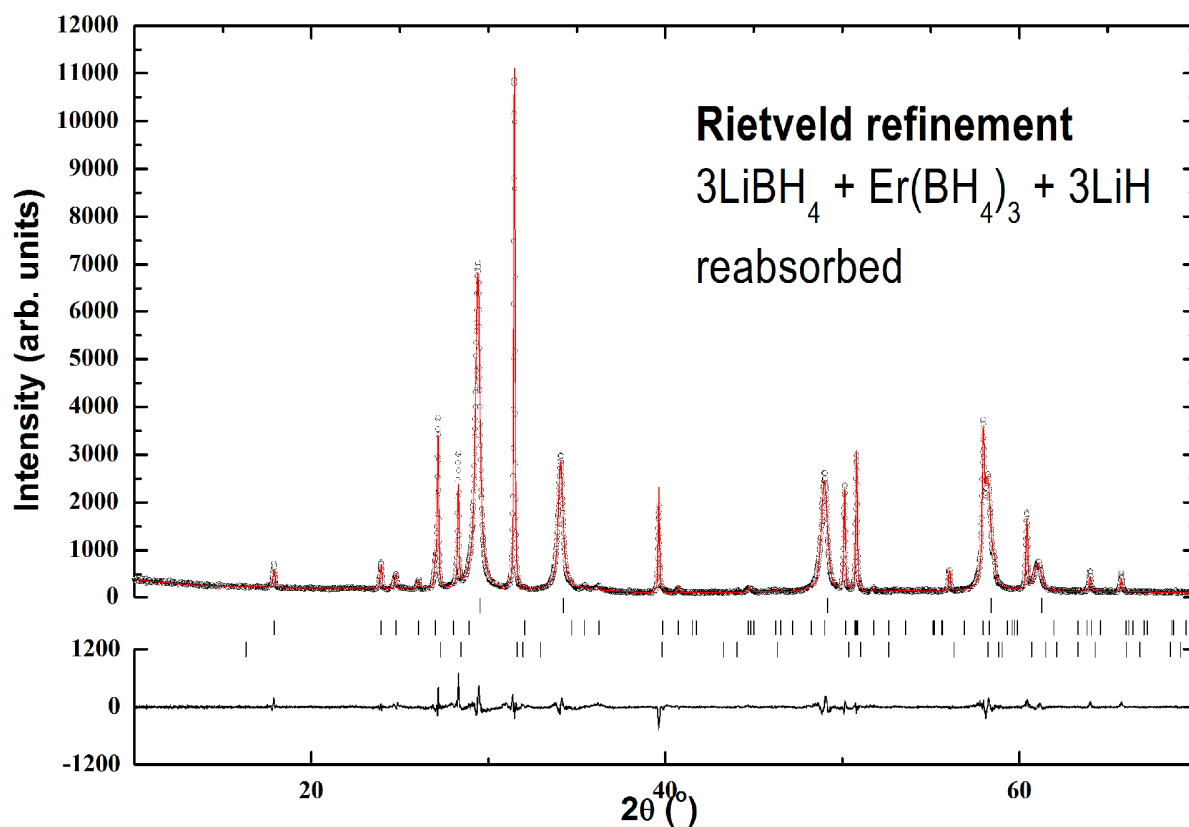

**Figure S8.** PXD Rietveld refinement and difference plot of S2 after first reabsorption. Observed (circles) and calculated (red line) patterns and difference plot (below). Vertical tick marks for the Bragg peak positions for (from top): 1. *c*-ErH<sub>3</sub> in *Fm-3m* with 27.4(2) wt%; 2. LiBH<sub>4</sub> with 58.1(2) wt%, 3. *t*-ErH<sub>3</sub> in *P-3c1* with 14.45(4) wt%.  $R_{wp} = 8.32\%$ .  $\lambda = 1.54059\text{\AA}$ .

**Table S1.** Atomic positions (*x*, *y*, *z*) and displacement factor ( $U_{iso}$ ) refined for Er and B in Er(BH<sub>4</sub>)<sub>3</sub> with data from Fig. S3. Estimated standard deviations in brackets.

| Atom | Position    | <i>X</i>  | <i>y</i>  | <i>z</i>  | $U_{iso}$ |
|------|-------------|-----------|-----------|-----------|-----------|
| Er1  | 8 <i>c</i>  | 0.2168(1) | 0.2168(1) | 0.2168(1) | 0.0235(4) |
| B1   | 24 <i>d</i> | 0.197(4)  | 0.255(8)  | 0.965(4)  | 0.018(17) |
| H1   | 24 <i>d</i> | 0.2892    | 0.2539    | 0.0231    | 0.00032   |
| H2   | 24 <i>d</i> | 0.1039    | 0.2248    | 0.0335    | 0.00032   |
| H3   | 24 <i>d</i> | 0.1736    | 0.3472    | 0.9186    | 0.00032   |
| H4   | 24 <i>d</i> | 0.2012    | 0.1633    | 0.8931    | 0.00032   |
